# Supplementary material for: Palladium-catalysed deaminative/decarboxylative cross-coupling of organoammonium salts with carboxylic acids
Source: Royal Society of Chemistry journal article supplement (doi:10.1039/d2ob02251f), 2023-01-01
Supplement: d2ob02251f2.xlsx [file d2ob02251f2.xlsx]

## Sheet: 3b
[MS Spectrum]
# of Peaks	93
Raw Spectrum	[0.417],(scan:[248])
Background Spectrum	No Background Spectrum
Base Peak	m/z 311.1100 (Inten : 968,336)
m/z	Abs. Inten.	Rel. Inten.
215.028	13184	1.36
217.044	16512	1.71
222.883	56064	5.79
224.88	19776	2.04
241.033	33024	3.41
242.176	13184	1.36
293.007	13184	1.36
293.113	85760	8.86
294.997	13184	1.36
295.083	90082	9.3
296.08	19840	2.05
311.11	968336	100	1
311.265	13184	1.36
311.459	13184	1.36
312.115	141696	14.63	1
312.993	102208	10.56
313.102	13184	1.36	1
318.092	13184	1.36
320.9	65920	6.81
321.223	108672	11.22
322.236	13184	1.36
325.191	13184	1.36
330.984	79168	8.18
331.984	16512	1.71
336.868	517912	53.48
337.091	52800	5.45
337.875	13184	1.36
338.865	75776	7.83
339.235	592314	61.17
340.135	13184	1.36
340.234	125325	12.94
349.239	13184	1.36
353.975	13184	1.36
355.991	13184	1.36
357.091	39552	4.08
359.125	16512	1.71
361.163	13184	1.36
363.271	13184	1.36
365.253	56128	5.8
367.25	13184	1.36
368.037	13184	1.36
372.005	39552	4.08
377.087	13184	1.36
388.296	13184	1.36
392.145	13184	1.36
393.279	69184	7.14	1
394.285	13184	1.36	1
395.283	16512	1.71	1
397.116	164526	16.99
398.105	13184	1.36
399.233	42880	4.43	1
400.242	19840	2.05	1
401.236	13184	1.36	1
404.303	13184	1.36
405.97	49472	5.11
407.967	16512	1.71
410.802	42880	4.43
412.802	19776	2.04
423.143	13184	1.36
425.217	23104	2.39
427.219	13184	1.36
439.894	23104	2.39
441.108	33024	3.41
441.891	33024	3.41
442.112	13184	1.36
449.17	42880	4.43
451.173	13184	1.36
459.103	85696	8.85
460.11	16512	1.71
473.288	368327	38.04
473.856	13184	1.36
474.286	69184	7.14
474.844	13184	1.36
476.864	33024	3.41
493.131	424565	43.84	1
494.132	113535	11.72	1
495.13	180031	18.59	1
496.128	16512	1.71	1
499.025	16512	1.71
509.122	13184	1.36
519.267	13184	1.36
524.787	13184	1.36
563.206	29696	3.07
571.503	49536	5.12
603.491	13184	1.36
604.476	13184	1.36
631.503	13184	1.36
673.207	19840	2.05
695.057	86227	8.9
696.057	33024	3.41
821.289	13184	1.36
823.288	13184	1.36
825.29	13184	1.36
Event	1

## Sheet: 3i
[MS Spectrum]
# of Peaks	85
Raw Spectrum	[4.690],(scan:[1877])
Background Spectrum	No Background Spectrum
Base Peak	m/z 121.1213 (Inten : 578,810)
m/z	Abs. Inten.	Rel. Inten.
103.112	71552	12.36
107.106	38528	6.66
108.084	31936	5.52
109.081	12672	2.19
118.086	12672	2.19
120.081	12672	2.19
121.121	578810	100
122.125	19328	3.34
128.063	12672	2.19
135.138	38528	6.66
139.085	12672	2.19
149.025	25920	4.48
150.06	12672	2.19
152.062	16000	2.76
153.069	12672	2.19
163.038	12672	2.19
163.134	22592	3.9
164.988	12672	2.19
165.068	12672	2.19
166.082	45184	7.81
171.147	19328	3.34
177.049	12672	2.19
177.087	19328	3.34
179.011	12672	2.19
181.038	99372	17.17
185.112	25856	4.47
193.026	132302	22.86
194.112	12672	2.19
195.078	22592	3.9
205.071	12672	2.19
209.077	12672	2.19
211.077	19328	3.34
219.167	159803	27.61
220.155	12672	2.19
227.109	32000	5.53
231.098	12672	2.19
237.152	25920	4.48
246.127	91264	15.77
247.131	12672	2.19
249.087	12672	2.19
256.264	114304	19.75
269.117	22592	3.9
274.274	61632	10.65
279.093	96323	16.64
279.161	61632	10.65
280.273	16000	2.76
282.28	409293	70.71
283.28	84608	14.62
284.303	141368	24.42
285.309	12672	2.19
291.129	12672	2.19
293.111	49534	8.56
298.069	19328	3.34
298.3	12672	2.19
299.134	12672	2.19
301.137	35328	6.1
304.264	19264	3.33
305.15	12672	2.19
307.138	12672	2.19
309.125	32000	5.53
317.151	58368	10.08
318.305	28672	4.95
320.168	12672	2.19
321.14	187166	32.34	1
322.136	25344	4.38	1
323.146	84672	14.63	1
324.144	12672	2.19	1
325.107	12672	2.19
331.163	41856	7.23
335.166	68160	11.78
337.139	19328	3.34
338.334	22592	3.9
339.123	12672	2.19
340.265	16000	2.76
345.137	25344	4.38
347.163	32000	5.53
357.143	32000	5.53
359.236	45120	7.8
361.068	61632	10.65
374.178	19328	3.34
384.237	19328	3.34
393.091	368694	63.7
394.098	72284	12.49
396.811	16000	2.76
397.317	12672	2.19
Event	1

## Sheet: 3k
[MS Spectrum]
# of Peaks	61
Raw Spectrum	[1.022],(scan:[609])
Background Spectrum	No Background Spectrum
Base Peak	m/z 336.8654 (Inten : 2,626,186)
m/z	Abs. Inten.	Rel. Inten.
265.058	20352	0.77
285.001	36736	1.4
286.003	23616	0.9
289.013	43328	1.65
301.03	152448	5.8
303.027	30144	1.15
311.987	20352	0.77	1
312.99	214976	8.19	1
313.989	20352	0.77	1
320.893	933465	35.54
321.89	26880	1.02
322.892	46656	1.78
336.865	2626186	100
337.029	30144	1.15
337.127	20352	0.77
337.205	20352	0.77
337.863	93184	3.55
338.863	494155	18.82
352.912	70208	2.67
431.031	57024	2.17
433.996	109632	4.17
434.999	23616	0.9
449.023	1796790	68.42	1
449.213	20352	0.77
450.025	356507	13.58	1
451.023	83328	3.17	1
460.981	282454	10.76
461.983	33408	1.27
472.978	20352	0.77
474.995	20352	0.77
484.93	33472	1.27
488.948	96512	3.67
500.907	177004	6.74
508.821	47232	1.8
524.785	162557	6.19
526.796	20352	0.77
579.012	20352	0.77
585.058	30144	1.15
586.053	20352	0.77
597.018	456050	17.37
598.025	121541	4.63
620.964	650246	24.76	1
621.967	86720	3.3	1
622.971	53760	2.05	1
632.916	33472	1.27
636.939	1145447	43.62	1
637.945	280448	10.68	1
638.938	191344	7.29	1
648.901	154791	5.89
680.754	102592	3.91
696.722	235517	8.97
698.722	50496	1.92
712.701	335804	12.79
714.705	102592	3.91
745.005	20352	0.77
768.958	150202	5.72
769.962	23616	0.9
784.93	270711	10.31	1
785.915	20352	0.77	1
786.931	23616	0.9	1
824.858	20352	0.77
Event	1

## Sheet: 3q
[MS Spectrum]
# of Peaks	103
Raw Spectrum	[0.287],(scan:[171])
Background Spectrum	No Background Spectrum
Base Peak	m/z 293.0105 (Inten : 3,749,741)
m/z	Abs. Inten.	Rel. Inten.
212.014	13056	0.35
231.174	167488	4.47	1
232.175	13056	0.35	1
233.181	13056	0.35	1
242.168	13056	0.35
253.01	13056	0.35
255.232	85376	2.28
256.233	13056	0.35
259.175	16320	0.44
261.187	19584	0.52
272.013	112842	3.01
273.001	13056	0.35
275.021	68736	1.83
275.072	13056	0.35
275.167	19584	0.52
276.015	13056	0.35
277.181	95168	2.54
279.237	13056	0.35
281.258	16320	0.44
283.268	75456	2.01
287.022	13056	0.35
287.241	19584	0.52
289.183	98432	2.63
289.999	13056	0.35
291.197	22912	0.61
292.018	556132	14.83
293.01	3749741	100	1
293.166	107451	2.87
293.265	63074	1.68
293.337	81173	2.16
293.531	62650	1.67
294.014	770852	20.56	1
294.169	13056	0.35
295.01	323335	8.62	1
296.021	16320	0.44	1
300.021	13056	0.35
305.035	65472	1.75	1
306.032	16320	0.44	1
307.034	13056	0.35	1
310.002	13056	0.35
311.016	137455	3.67
312.024	13056	0.35
313.012	642803	17.14	1
313.18	13056	0.35
313.214	13056	0.35
314.014	81984	2.19	1
315.017	19584	0.52	1
320.019	36032	0.96
321.218	16320	0.44
323.025	13056	0.35
325.053	19584	0.52
325.191	13056	0.35
326.018	13056	0.35
330.984	55680	1.48
333.022	13056	0.35
334.033	513716	13.7	1
335.038	141355	3.77	1
336.032	19648	0.52	1
337.217	13056	0.35
339.234	897099	23.92	1
339.396	13056	0.35
340.236	230847	6.16	1
341.236	13056	0.35	1
347.227	16320	0.44
349.239	13056	0.35
358.12	39296	1.05	1
359.127	150513	4.01	1
360.129	32640	0.87	1
363.254	88640	2.36
364.255	13056	0.35
365.253	137455	3.67	1
366.253	19584	0.52	1
367.25	39296	1.05	1
368.046	13056	0.35
370.046	19584	0.52
371.057	13056	0.35
375.233	35904	0.96
375.265	16320	0.44
377.24	92735	2.47
377.31	13056	0.35
378.238	13056	0.35
389.238	26240	0.7
393.279	129515	3.45	1
394.285	32640	0.87	1
395.271	45824	1.22	1
399.238	22912	0.61
403.313	22912	0.61
422.113	94074	2.51
425.218	26240	0.7
457.279	13056	0.35
460.987	52416	1.4
473.288	292843	7.81
474.292	87546	2.33
489.269	19584	0.52
519.262	122427	3.26	1
520.246	13056	0.35	1
521.271	26112	0.7	1
529.279	42560	1.14
530.27	13056	0.35
631.515	32640	0.87
695.059	129306	3.45	1
696.057	45824	1.22	1
697.06	45888	1.22	1
Event	1

## Sheet: 3r
[MS Spectrum]
# of Peaks	101
Raw Spectrum	[0.618],(scan:[367])
Background Spectrum	No Background Spectrum
Base Peak	m/z 278.0353 (Inten : 2,827,431)
m/z	Abs. Inten.	Rel. Inten.
217.042	26624	0.94
231.179	23360	0.83
233.151	20096	0.71
237.034	36864	1.3
255.238	16768	0.59
256.032	148607	5.26
257.028	13440	0.48
258.032	53248	1.88	1
259.038	176164	6.23	1
260.046	13440	0.48	1
262.021	20096	0.71
263.035	23360	0.83
265.028	13440	0.48
273.018	49920	1.77	1
274.027	86144	3.05	1
275.024	26880	0.95	1
276.041	329155	11.64	1
277.033	2720786	96.23	1
277.182	66432	2.35	1
277.278	26880	0.95
277.35	68864	2.44
277.532	26880	0.95	1
278.035	2827431	100	1
278.188	98522	3.48	1
278.274	16768	0.59
278.354	71454	2.53
278.543	57699	2.04	1
279.042	873526	30.89	1
279.189	26880	0.95	1
279.524	13440	0.48	1
280.05	63168	2.23	1
281.026	99264	3.51
281.251	13440	0.48
282.027	16768	0.59
283.264	23360	0.83
287.047	13440	0.48
289.042	36864	1.3
289.184	66368	2.35
290.048	33536	1.19
291.029	171313	6.06
291.197	23360	0.83
293.024	117575	4.16	1
294.029	227648	8.05	1
295.038	343724	12.16	1
296.042	97673	3.45	1
296.105	13440	0.48
297.034	1870425	66.15	1
297.191	20096	0.71
297.372	13440	0.48
298.038	285748	10.11	1
299.046	26880	0.95	1
299.095	13440	0.48
301.031	13440	0.48
304.046	13440	0.48
307.025	13440	0.48
309.021	49920	1.77	1
310.022	20032	0.71	1
311.038	33536	1.19	1
312.029	53184	1.88	1
313.029	112448	3.98	1
314.038	89408	3.16	1
315.043	69696	2.46	1
318.058	20096	0.71
321.216	13440	0.48
325.048	20032	0.71
329.025	13440	0.48
330.031	13440	0.48
339.234	1800854	63.69	1
339.397	43392	1.53	10
339.492	13440	0.48	10
339.589	26880	0.95	10
339.783	13440	0.48
340.238	559812	19.8	1
341.242	59840	2.12	1
349.23	13440	0.48
359.133	13440	0.48
365.254	46656	1.65
367.241	20096	0.71
393.28	59904	2.12
395.274	30208	1.07
409.311	13440	0.48
422.024	13440	0.48
422.116	107968	3.82
423.124	13440	0.48
425.029	72960	2.58
426.036	33536	1.19
443.01	80645	2.85
445.038	13440	0.48
457.289	13440	0.48
473.287	302987	10.72
474.292	89275	3.16
489.269	20096	0.71
519.256	123259	4.36	1
520.246	20096	0.71	1
521.249	20096	0.71	1
631.515	33536	1.19	1
632.499	13440	0.48	1
633.508	13440	0.48	1
695.048	56512	2
696.057	26880	0.95
757.392	13440	0.48
Event	1

## Sheet: 3t
[MS Spectrum]
# of Peaks	91
Raw Spectrum	[1.537],(scan:[911])
Background Spectrum	No Background Spectrum
Base Peak	m/z 327.0650 (Inten : 1,932,909)
m/z	Abs. Inten.	Rel. Inten.
231.173	13312	0.69
233.02	33152	1.72
252.045	16576	0.86
253.031	337804	17.48
254.035	23168	1.2
255.232	13312	0.69
263.019	13312	0.69
266.024	59392	3.07
267.066	184512	9.55	1
268.062	16576	0.86	1
269.054	13312	0.69	1
276.044	19904	1.03	1
277.047	135792	7.03	1
278.049	13312	0.69	1
281.059	13312	0.69
281.243	13312	0.69
285.044	13312	0.69
287.241	13312	0.69
289.186	19840	1.03
291.195	19840	1.03
292.035	33152	1.72	1
293.032	13312	0.69	1
294.046	13312	0.69	1
297.042	26496	1.37
302.066	23168	1.2
305.069	49600	2.57
307.061	79168	4.1
309.036	13312	0.69
312.043	499776	25.86
313.046	62784	3.25
317.09	79232	4.1
321.218	16576	0.86
325.068	135193	6.99
325.182	13312	0.69
326.07	33152	1.72
327.065	1932909	100	1
327.226	46336	2.4	10
327.33	26624	1.38	10
327.416	26624	1.38	10
327.606	13312	0.69
328.069	432671	22.38	1
329.032	16576	0.86
329.072	107158	5.54	1
337.024	13312	0.69
339.233	1109320	57.39	1
339.396	33152	1.72
339.572	13312	0.69
340.064	13312	0.69	1
340.238	332046	17.18	1
341.069	13312	0.69	1
341.245	39808	2.06	1
342.055	43072	2.23	1
348.089	33152	1.72
349.241	16576	0.86
355.003	264589	13.69
356.009	39808	2.06
358.127	16576	0.86	1
359.132	161237	8.34	1
360.059	36416	1.88
360.129	26624	1.38	1
363.257	79168	4.1	1
364.255	13312	0.69	1
365.248	19840	1.03	1
367.25	13312	0.69
368.044	16576	0.86	1
369.045	19840	1.03	1
370.037	13312	0.69	1
389.244	19904	1.03
393.28	13312	0.69
396.031	33152	1.72
399.238	16576	0.86
414.017	884640	45.77	1
414.194	13312	0.69
415.024	192520	9.96	1
416.031	16576	0.86	1
425.218	13312	0.69
457.295	39744	2.06
468.084	13312	0.69
473.288	146688	7.59
474.301	43072	2.23
476.06	16576	0.86
695.052	544015	28.14	1
696.057	221410	11.45	1
697.056	144478	7.47	1
698.074	26624	1.38	1
713.359	13312	0.69
731.028	33152	1.72	1
732.009	13312	0.69
732.061	13312	0.69	1
733.043	13312	0.69	1
757.405	13312	0.69
Event	1

## Sheet: 3u
[MS Spectrum]
# of Peaks	83
Raw Spectrum	[2.883],(scan:[1719])
Background Spectrum	No Background Spectrum
Base Peak	m/z 336.8656 (Inten : 5,577,082)
m/z	Abs. Inten.	Rel. Inten.
220.035	29248	0.52
222.029	25984	0.47
222.884	32512	0.58
223.036	525046	9.41	1
224.038	78144	1.4	1
224.879	25920	0.46
225.034	22656	0.41	1
232.917	19328	0.35
235.056	29248	0.52
250.145	25984	0.47
255.236	29248	0.52
281.05	375858	6.74
281.249	19328	0.35
282.051	25984	0.47
283.262	22656	0.41
285.055	74944	1.34
288	19328	0.35
289.013	35840	0.64
291.201	19328	0.35
301.028	25984	0.47
312.99	91456	1.64
314.819	58496	1.05
320.894	574208	10.3
322.892	22656	0.41
323.091	32512	0.58
325.093	19328	0.35
330.07	22656	0.41
336.866	5577082	100
337.028	183701	3.29
337.132	104653	1.88
337.215	484414	8.69	1
337.421	118861	2.13
337.869	247080	4.43
338.221	233908	4.19	1
338.864	1047903	18.79
339.23	478904	8.59	1
339.86	22656	0.41
340.235	101248	1.82	1
340.863	25984	0.47
343.09	25920	0.46
345.091	152370	2.73
367.22	22656	0.41
387.083	577992	10.36	1
388.084	97984	1.76	1
389.028	55168	0.99
389.083	19328	0.35	1
394.831	19328	0.35
399.103	22656	0.41
403.224	97920	1.76
404.222	25984	0.47
409.311	403923	7.24
410.313	88064	1.58
410.798	130816	2.35
410.952	104512	1.87
412.796	84736	1.52
412.955	22656	0.41
434.002	19328	0.35
447.07	19328	0.35
449.021	613055	10.99	1
450.041	312118	5.6	1
451.057	87506	1.57	1
452.965	19328	0.35
459.312	181726	3.26	1
460.301	19328	0.35	1
460.981	58432	1.05
461.306	38656	0.69	1
468.957	140267	2.52
472.967	19328	0.35
473.28	285116	5.11
474.286	29248	0.52
500.907	19328	0.35
524.785	266475	4.78
526.772	55168	0.99	3
527.137	22656	0.41	3
527.454	19328	0.35	3
529.462	25984	0.47
574.999	117760	2.11
576.98	19328	0.35
597.017	42432	0.76
636.94	191242	3.43
637.933	19328	0.35
661.2	19328	0.35
712.693	121675	2.18
Event	1
